# Supplementary material for: Absence of IFN-γ accelerates thrombus resolution through enhanced MMP-9 and VEGF expression in mice
Source: JCI journal article supplement (doi:10.1172/jci40782), 2011-06-06
Supplement: sd1 [file 1]

**Supplemental Table I. Sequences of the primers used for real-time RT-PCR**

| Transcript                           | Sequence                          |
|--------------------------------------|-----------------------------------|
| <i>CXCL1/KC</i>                      | (F) 5'-GCTTGAAGGTGTTGCCCTCAG-3'   |
|                                      | (R) 5'-AAGCCTCGCGACCATTCCTTG-3'   |
| <i>CXCL2/MIP-2</i>                   | (F) 5'-GCGCTGTCAATGCCTGAAGA-3'    |
|                                      | (R) 5'-TTTGACCGCCCTTGAGAGTG-3'    |
| <i>CCL2/MCP-1</i>                    | (F) 5'-GCATCCACGTGTTGGCTCA-3'     |
|                                      | (R) 5'-CTCCAGCCTACTCATTGGGATCA-3' |
| <i>CCL3/MIP-1<math>\alpha</math></i> | (F) 5'-TGAAACCAGCAGCCTTTGCTC-3'   |
|                                      | (R) 5'-AGGCATTCAGTTCCAGGTCAGTG-3' |

<sup>a</sup> (F) Forward primer; (R) Reverse primer

## **Legends to Supplemental Figures**

**Supplemental Figure 1.** Immunohistochemical detection of IFN- $\gamma$  protein in human venous thrombi obtained from an autopsy case. We used serial sections to immunostain with anti-CD68 (a marker of macrophages) and anti-IFN- $\gamma$  antibodies. Representative results from three individual cases are shown here.

**Supplemental Figure 2.** Histopathological analyses of venous thrombi obtained from WT and IFN- $\gamma^{-/-}$  mice at 5 and 14 days after the IVC ligation. Thrombus samples were stained with Masson trichrome solution. Representative results from six independent experiments are shown here (original magnification, x 100).

**Supplemental Figure 3.** Intrathrombotic gene expression of *CXCL1/KC*, *CXCL2/MIP-2*, *CCL2/MCP-1*, and *CCL3/MIP-1 $\alpha$*  was determined by real time RT-PCR as described in Materials and Methods. All values represent the mean  $\pm$  SEM (n=6 animals).

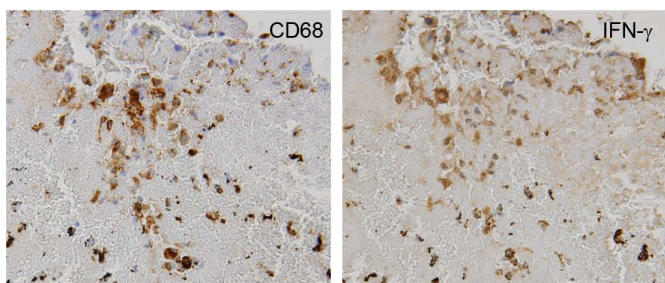

Supplemental Figure 1

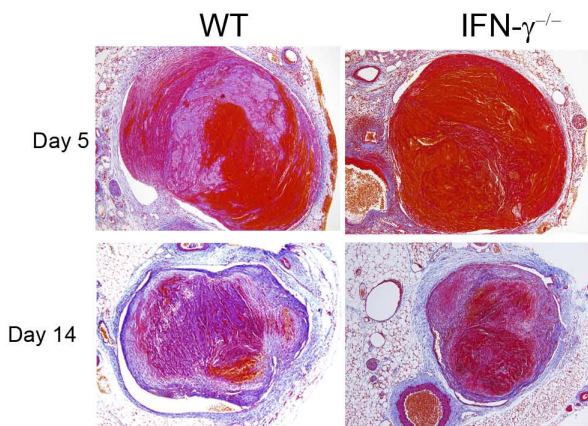

Supplemental Figure 2

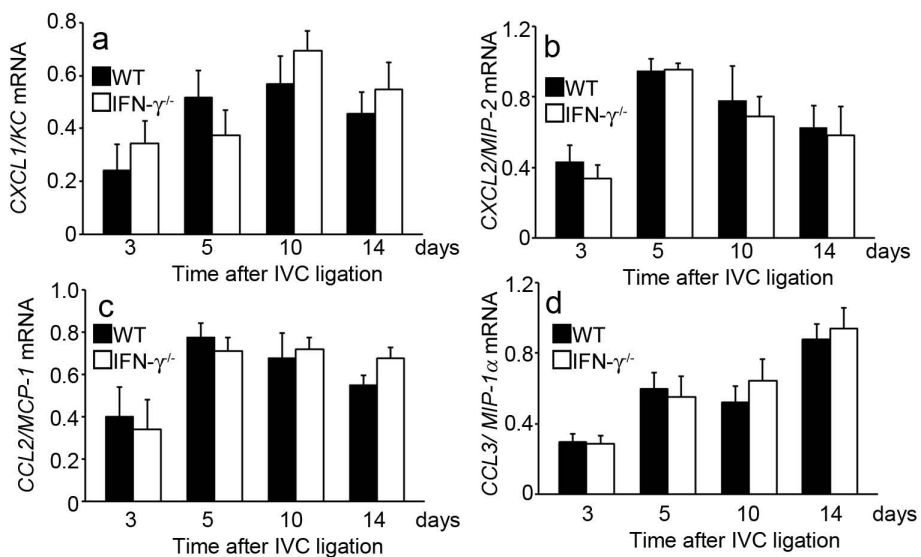

Supplemental Figure 3
